# Supplementary material
Source: PubMed Central journal article supplement (PMC4345627)
Supplement: pnas.201417623SI.pdf [file pnas.201417623SI.pdf]

# Supporting Information

Tamaki et al. 10.1073/pnas.1417623112

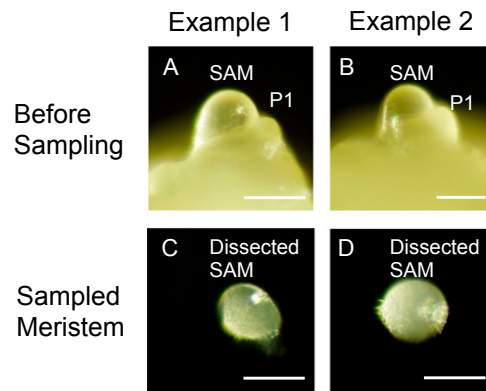

**Fig. S1.** Dissection of SAMs of rice. Sampling of SAM from rice. Two examples of sampling are shown (A and C for example 1 and B and D for example 2). (A and B) Plants at 28 DAG were dissected under a microscope to expose the SAM. (C and D) The dome-shaped structure of the SAM was further dissected for sampling. P1, leaf primordia at plastochron 1 (P1) stage. (Scale bars, 50  $\mu\text{m}$ .)

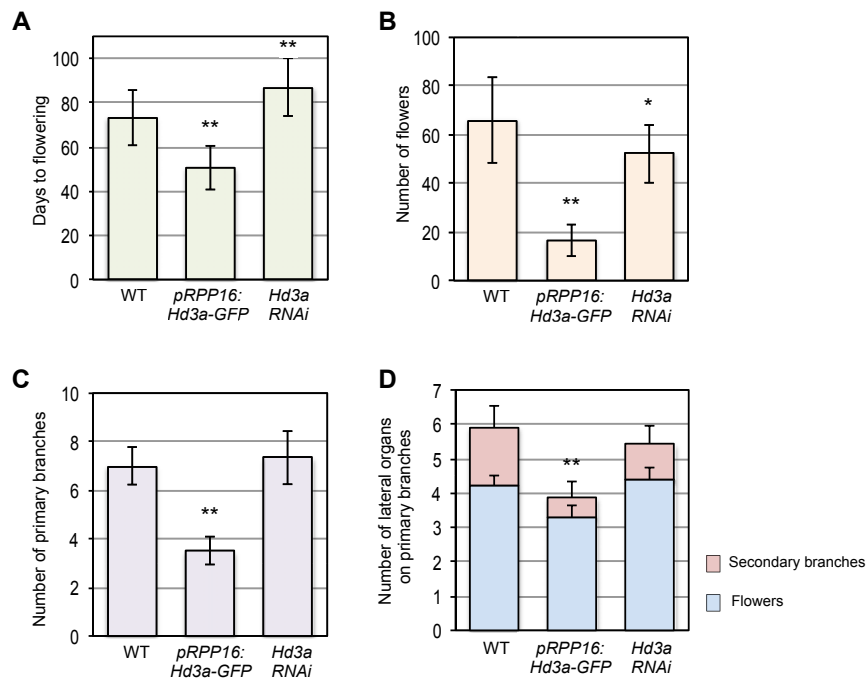

**Fig. S2.** Inflorescence phenotypes of *pRPP16:Hd3a-GFP* and *Hd3a RNAi*. Days to flowering (A), number of flowers (B), number of primary branches (C), and number of lateral organs on primary branches (D). In D, blue and pink bars indicate number of flowers and number of secondary branches, respectively. Results from WT and *pRPP16:Hd3a-GFP* are the same as those in Fig. 2. \* $P < 0.05$ ; \*\* $P < 0.01$  (significant difference relative to WT by *t* test).

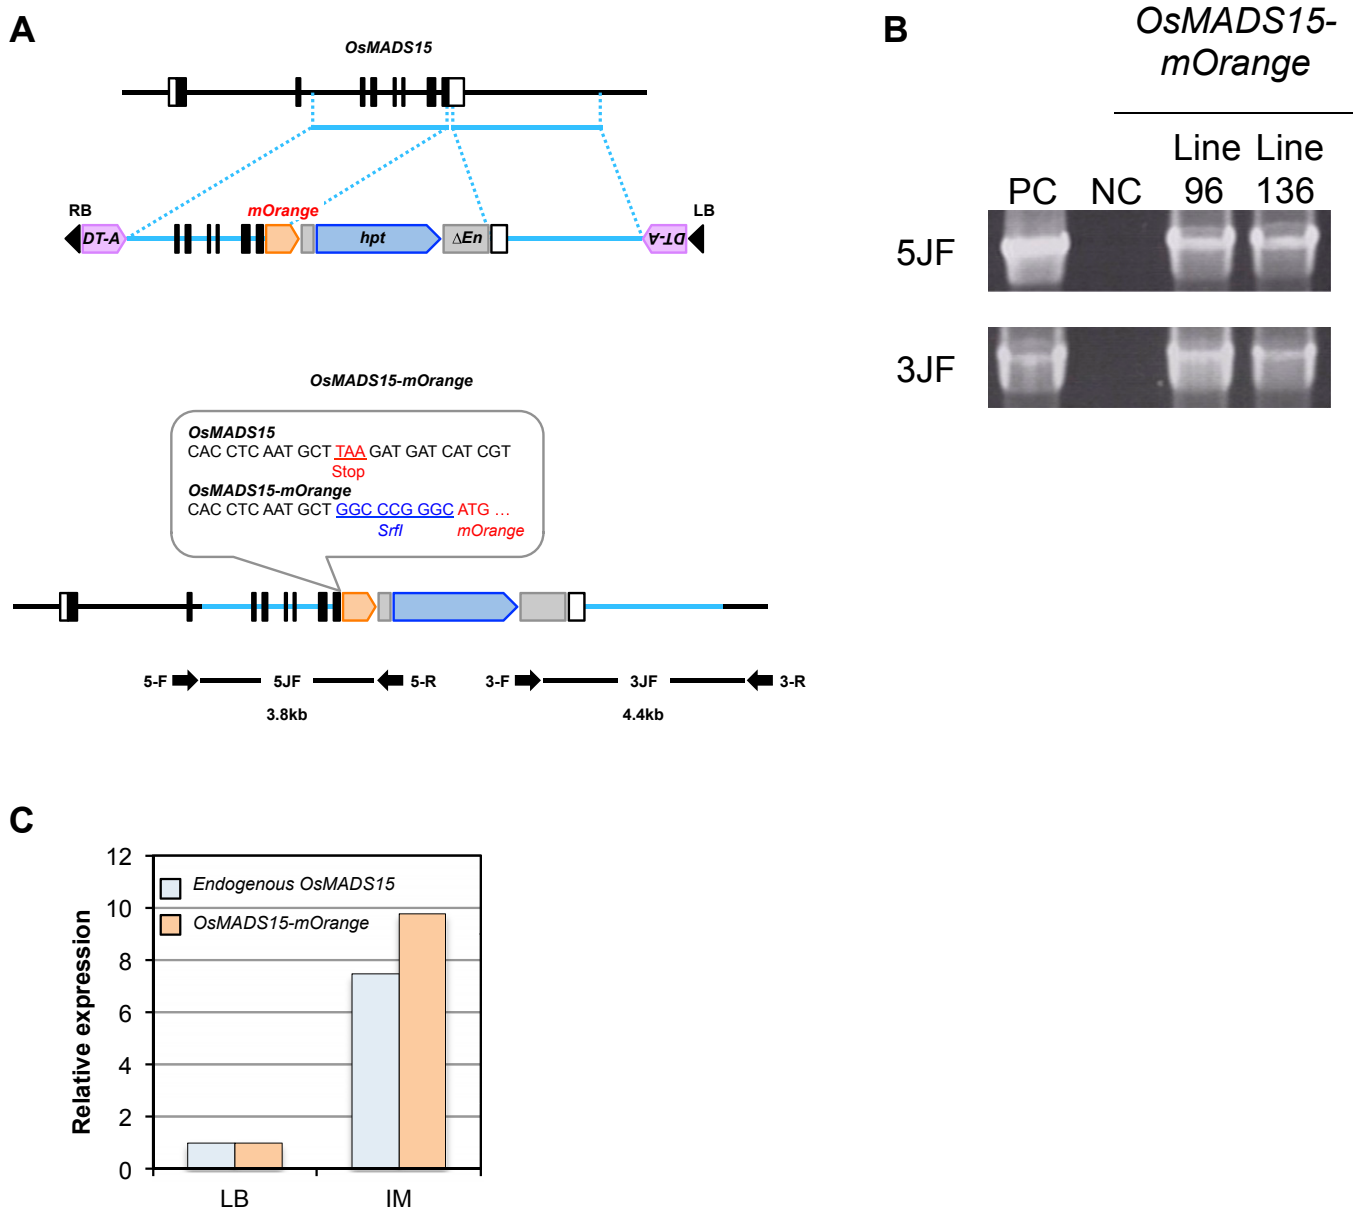

**Fig. S3.** *mOrange* knock-in modification of the *OsMADS15* locus by gene targeting. (A, Upper) Schematic diagrams of the *OsMADS15* gene and the T-DNA region of the knock-in targeting vector p15Or. Black and white boxes indicate exons and UTRs, respectively. Blue lines represent the sequence corresponding to the homologous regions carried by p15Or. RB, right border; *DT-A*, diphtheria toxin A gene; *hpt*, hygromycin phosphotransferase gene for positive selection;  $\Delta En$ , functional transcriptional stop sequence from *En/Spm* transposon; LB, left border. (A, Lower) Structure of resultant *OsMADS15-mOrange* gene. Lines 5JF and 3JF indicate the 5' and 3' junction fragments generated by homologous recombination. Flanking black arrows 5-F/5-R and 3-F/3-R represent primers used for PCR screening of targeted callus lines. (B) Confirmation of gene targeting by PCR screening. The regions amplified are indicated in A. As a positive control of PCR (PC), we constructed a plasmid containing the same *OsMADS15-mOrange* DNA sequence predicted to arise from successful gene targeting and used this plasmid as a template. NC, negative control without template. (C) Expression patterns of the endogenous *OsMADS15* gene and the *OsMADS15-mOrange* gene in heterozygous plants. Endogenous *OsMADS15* expression was quantified by qPCR using primers that anneal within the 3' UTR of *OsMADS15*, and *OsMADS15-mOrange* expression was quantified by using primers annealing in the *mOrange* coding region. Relative expression was calculated by normalizing the level in the leaf blade (LB) to 1. IM, inflorescence meristem at stage 3.

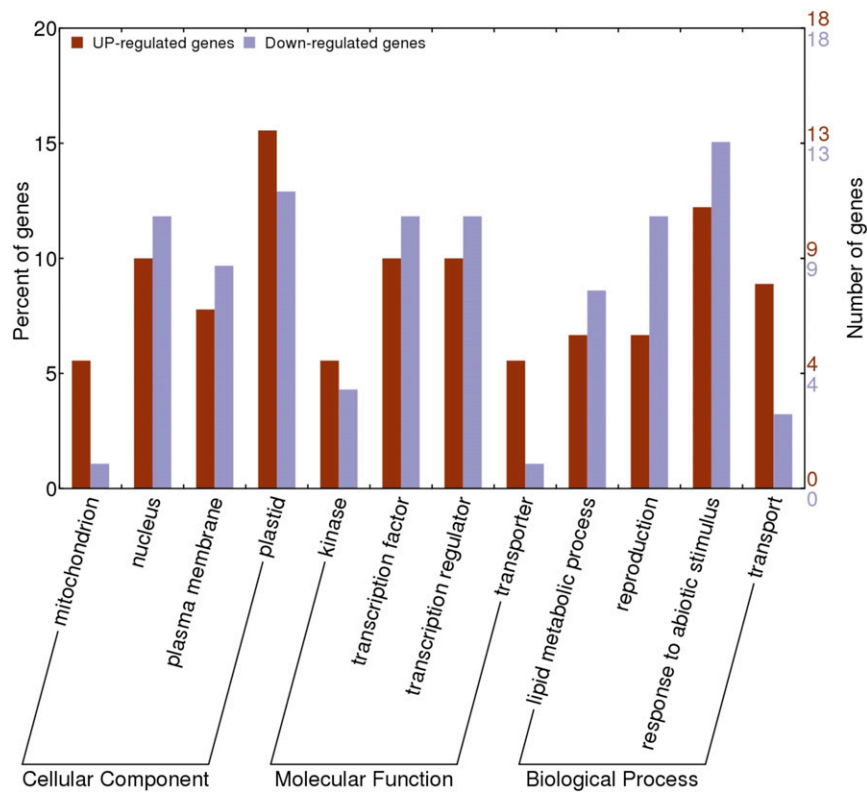

**Fig. S4.** Comparison of enriched GO terms between Hd3a-up-regulated and -down-regulated genes. Enrichment in GO terms between up- and down-regulated genes was analyzed by WEGO (1). GO terms that were represented by more than five genes were considered for the analysis.

1. Ye J, et al. (2006) WEGO: A web tool for plotting GO annotations. *Nucleic Acids Res* 34(web server issue):W293–W297.

**Table S1. Summary of read numbers based on RNA-seq data from rice meristems**

|                                            | WT 1              | WT 2              | WT 3              | RNAi 1            | RNAi 2            | RNAi 3            |
|--------------------------------------------|-------------------|-------------------|-------------------|-------------------|-------------------|-------------------|
| Used reads                                 | 50,777,755        | 51,563,430        | 50,188,150        | 52,894,765        | 51,017,354        | 51,926,998        |
| Mapped reads<br>(percentage of total, %)   | 43,738,292 (86.1) | 44,398,235 (86.1) | 43,325,565 (86.3) | 36,453,629 (68.9) | 34,520,738 (67.7) | 35,777,143 (68.9) |
| Unmapped reads<br>(percentage of total, %) | 7,039,463 (13.9)  | 7,165,195 (13.9)  | 6,862,585 (13.7)  | 16,44,1136 (31.1) | 16,496,616 (32.3) | 16,149,855 (31.1) |

**Table S2. Primers used in this study**

| Name                | Sequence                                   | Note                                              |
|---------------------|--------------------------------------------|---------------------------------------------------|
| MADS15 5'-F         | AGTCAAGCTTAACTTCAAACCTCGTGTCTTTTGCACTCTGGC | PCRs for cloning of 5'-homologous region of p15Or |
| MADS15 5'-R         | TGACGCCCCGGCCAGCATTGAGGTGGCTCAGCATCCATGG   | PCRs for cloning of 5'-homologous region of p15Or |
| MADS15 3'-F         | AGTCGTTTAAACGATGATCATCGTCGTCGTCGGCCAAAC    | PCRs for cloning of 3'-homologous region of p15Or |
| MADS15 3'-R         | TGACACTAGTGCCGACTTCGTGCTGTACAAGCTCAAGGAG   | PCRs for cloning of 3'-homologous region of p15Or |
| 5-F                 | TCCTTTTCTATTGCATTAGCATTTCT                 | Detection of 5JF generated by GT with p15Or       |
| 5-R                 | TCCACGATGGTGTAGTCCCTCGTTGT                 | Detection of 5JF generated by GT with p15Or       |
| 3-F                 | CATGCTAGTCCGCCTCCGGATCAGAGCACG             | Detection of 3JF generated by GT with p15Or       |
| 3-R                 | GCGCCATGGAGATGAACAAGGTGAGGTACA             | Detection of 3JF generated by GT with p15Or       |
| mOr-qF2             | CGGCGAGTTTCATCTACAAGG                      | qPCR of mOrange                                   |
| mOr-qR2             | TGGTCTTCTTCTGCATTACGG                      | qPCR of mOrange                                   |
| OsMADS15-F          | CGTCGTCGGCCAAACAG                          | qPCR and In situ hybridization of OsMADS15        |
| OsMADS15-R          | TGACTTCAATTCATTCAAGGTTGCT                  | qPCR and In situ hybridization of OsMADS15        |
| Ubq-Real-F          | AACCAGCTGAGGCCCAAGA                        | qPCR of Ubiquitin                                 |
| Ubq-Real-R          | ACGATTGATTTAACCAGTCCATGA                   | qPCR of Ubiquitin                                 |
| OsFD1-F             | CAAAGCTAGCTAATCCAGG                        | qPCR and in situ hybridization of OsFD1           |
| OsFD1-R             | GCCACAGCTAAGCTTCCCTCCATG                   | qPCR and In situ hybridization of OsFD1           |
| GF14b-F             | GCGGAAGAGATCAGGGAAG                        | qPCR and In situ hybridization of GF14b           |
| GF14b-R             | CGACAACAATCACAGCCACA                       | qPCR and In situ hybridization of GF14b           |
| Hd3a-F              | GCTCACTATCATCATCCAGCATG                    | qPCR of Hd3a                                      |
| Hd3a-R              | CCTTGCTCAGCTATTTAATTCGATAA                 | qPCR of Hd3a                                      |
| RFT1-F              | TGGGTTAGCTGACCTAGATTCAAA                   | qPCR of RFT1                                      |
| RFT1-R              | GCCAACCACAAAGAGGATCG                       | qPCR of RFT1                                      |
| IAA19-F             | TGCCAAGGCACAAGTTGTTG                       | qPCR of IAA19                                     |
| IAA19-R             | CACTGGCGCCAATGTATT                         | qPCR of IAA19                                     |
| OsAUR1 -F           | ACCTTTTGTCTCAGCCACTAGA                     | qPCR of Aurora Kinase OsAUR1                      |
| OsAUR1 -R           | GATACTGGGCCGAGAGATTGC                      | qPCR of Aurora Kinase OsAUR1                      |
| PCNA -F             | CACCTCGGCATCCCTGACT                        | qPCR of PCNA                                      |
| PCNA -R             | CCTTGACAGATCCTGGAAAACCTC                   | qPCR of PCNA                                      |
| CycB2,2 - F         | GCATGCGCCCGAGATG                           | qPCR of CycB2,2                                   |
| CycB2,2 - R         | GGTGCTCCGATGATGTTCTTG                      | qPCR of CycB2,2                                   |
| proline oxidase - F | CTGGTCGTGTTTCCGTTTGT                       | qPCR of proline oxidase                           |
| proline oxidase - R | AGAAGACTCGCGACAATTGACA                     | qPCR of proline oxidase                           |
| LOC_Os01g15180 -F   | TAACGAGACAGTGGAGCAGC                       | qPCR of LOC_Os01g15180                            |
| LOC_Os01g15180 -R   | TACTTCACGATCCCAGTCGG                       | qPCR of LOC_Os01g15180                            |
| LOC_Os07g05750 -F   | GGAGGGTCCCATGAAACAGG                       | qPCR of LOC_Os07g05750                            |
| LOC_Os07g05750 -R   | GTGGTAGATGGATCGGCACA                       | qPCR of LOC_Os07g05750                            |
| LOC_Os08g12460 -F   | GATAGGAGGCAGCTTGACCA                       | qPCR of LOC_Os08g12460                            |
| LOC_Os08g12460 -R   | TGCAATCATTCATCAGAGGAAGA                    | qPCR of LOC_Os08g12460                            |
| LOC_Os05g23389 -F   | TGGTGGTATTGAGGCACATGTG                     | qPCR of LOC_Os05g23389                            |
| LOC_Os05g23389 -R   | GACATTGTTAGACCCGCCATAA                     | qPCR of LOC_Os05g23389                            |
| LOC_Os12g04830 -F   | TACAGTTGTACACCTCTGATCAG                    | qPCR of LOC_Os12g04830                            |
| LOC_Os12g04830 -R   | ACTGAGTACTACCCATTGTGAATCT                  | qPCR of LOC_Os12g04830                            |
| LOC_Os12g26830 -F   | TTTGTCCCTCGCTACCAATTG                      | qPCR of LOC_Os12g26830                            |
| LOC_Os12g26830 -R   | CATGGGCAGGGCACAAG                          | qPCR of LOC_Os12g26830                            |
| LOC_Os07g33180 -F   | AGACGGCTCCACTCCACA                         | qPCR of LOC_Os07g33180                            |
| LOC_Os07g33180 -R   | CTGATGGTGTGGAGATTAGGTGTA                   | qPCR of LOC_Os07g33180                            |
| LOC_Os01g11720 -F   | CAAGTGCTAGTCCAGAGGCC                       | qPCR of LOC_Os01g11720                            |
| LOC_Os01g11720 -R   | GTCTTCACGGTGGAGCTTATC                      | qPCR of LOC_Os01g11720                            |
| LOC_Os02g30960 -F   | CAAGGGCAAGCAACCTCTTG                       | qPCR of LOC_Os02g30960                            |
| LOC_Os02g30960 -R   | CCTCCACAATGGCTTGTTTTT                      | qPCR of LOC_Os02g30960                            |

## Other Supporting Information Files

[Dataset S1 \(XLSX\)](#)
